# Supplementary material
Source: PubMed Central journal article supplement (PMC4801686)
Supplement: NIHMS737231-supplement-01.pdf [file NIHMS737231-supplement-01.pdf]

## SUPPLEMENTAL MATERIAL

### ***Burden Of Potentially Pathologic Copy Number Variants Is Higher In Children With Isolated Congenital Heart Disease And Significantly Impairs Covariate-Adjusted Transplant-Free Survival***

Daniel Seung Kim<sup>1,3</sup>, Jerry H. Kim<sup>4</sup>, Amber A. Burt<sup>1</sup>, David R. Crosslin<sup>1,2</sup>, Nancy Burnham<sup>5</sup>, Cecilia E. Kim<sup>6</sup>, Donna M. McDonald-McGinn<sup>7</sup>, Elaine H. Zackai<sup>7</sup>, Susan C. Nicolson<sup>8</sup>, Thomas L. Spray<sup>5</sup>, Ian B. Stanaway<sup>2</sup>, Deborah A. Nickerson<sup>2</sup>, Patrick J. Heagerty<sup>3</sup>, Hakon Hakonarson<sup>6</sup>, J. William Gaynor<sup>5</sup>, and Gail P. Jarvik<sup>1,2</sup>

Departments of Medicine (Division of Medical Genetics)<sup>1</sup>, Genome Sciences<sup>2</sup>, Biostatistics<sup>3</sup>, and Anesthesiology and Pain Medicine<sup>4</sup>,  
University of Washington, Seattle, WA.

and  
Divisions of Cardiothoracic Surgery<sup>5</sup>, Genetics<sup>7</sup>, Cardiothoracic Anesthesiology<sup>8</sup>, and the Center for Applied Genomics<sup>6</sup>,  
The Children's Hospital of Philadelphia, Philadelphia, PA

**Presented at the 95<sup>th</sup> Annual Meeting of the American Association for Thoracic Surgery in Seattle, WA.**

Address for Correspondence:

Gail P. Jarvik, M.D., Ph.D.  
Medical Genetics, Box 357720  
University of Washington  
Seattle, WA 98195-7720  
Phone: 1-206-221-3974 / Fax: 1-206-543-3050  
Email: [pair@u.washington.edu](mailto:pair@u.washington.edu)

**Supplemental Table S1. qPCR validation of 38 CNVs identified in 38 unique CHD participants with available DNA.**

| <b>Group</b> | <b>CNV Region</b>         | <b>Size</b> | <b>CNV Type</b>     | <b>Validate</b> |
|--------------|---------------------------|-------------|---------------------|-----------------|
| CHD          | chr22:17257787-19792353   | 2,534,566   | Deletion, 1 copy    | 1               |
| CHD          | chr22:17257787-19792353   | 2,534,566   | Deletion, 1 copy    | 1               |
| CHD          | chr7:4102511-4867717      | 765,206     | Duplication, 1 copy | 1               |
| CHD          | chr18:13417800-15112502   | 1,694,702   | Duplication, 1 copy | 1               |
| CHD          | chr22:17257787-19792353   | 2,534,566   | Deletion, 1 copy    | 1               |
| CHD          | chr22:17257787-19792353   | 2,534,566   | Deletion, 1 copy    | 1               |
| CHD          | chr22:17257787-19792353   | 2,534,566   | Deletion, 1 copy    | 1               |
| CHD          | chr22:17257787-19792353   | 2,534,566   | Deletion, 1 copy    | 1               |
| CHD          | chr15:20306549-20685685   | 379,136     | Deletion, 1 copy    | 1               |
| CHD          | chr22:21122400-21554058   | 431,658     | Deletion, 1 copy    | 1               |
| CHD          | chr22:17257787-19792353   | 2,534,566   | Deletion, 1 copy    | 1               |
| CHD          | chr15:20306549-20685685   | 379,136     | Deletion, 1 copy    | 1               |
| CHD          | chr22:21011312-21554058   | 542,746     | Deletion, 1 copy    | 1               |
| CHD          | chr7:143056311-143505123  | 448,812     | Duplication, 1 copy | 1               |
| CHD          | chr16:15032942-16197033   | 1,164,091   | Duplication, 1 copy | 1               |
| CHD          | chr22:17257787-19792353   | 2,534,566   | Deletion, 1 copy    | 1               |
| CHD          | chr15:20306549-20685685   | 379,136     | Deletion, 1 copy    | 1               |
| CHD          | chr15:20306549-20685685   | 379,136     | Deletion, 1 copy    | 1               |
| CHD          | chr10:133136594-133608348 | 471,754     | Duplication, 1 copy | 1               |
| CHD          | chr10:46410734-47173619   | 762,885     | Duplication, 1 copy | 1               |
| CHD          | chr22:17257787-19726528   | 2,468,741   | Deletion, 1 copy    | 1               |
| CHD          | chr22:21024486-21441861   | 417,375     | Deletion, 1 copy    | 1               |
| CHD          | chr22:17257787-19792353   | 2,534,566   | Deletion, 1 copy    | 1               |
| CHD          | chr3:95067163-95989113    | 921,950     | Duplication, 1 copy | 1               |
| CHD          | chr10:2682656-3123648     | 440,992     | Duplication, 1 copy | 1               |
| CHD          | chr1:239320770-240023059  | 702,289     | Duplication, 1 copy | 1               |
| CHD          | chr12:33415349-34669982   | 1,254,633   | Duplication, 1 copy | 1               |
| CHD          | chr22:21024486-21554058   | 529,572     | Deletion, 1 copy    | 1               |
| CHD          | chr13:102725899-103348161 | 622,262     | Duplication, 1 copy | 1               |
| CHD          | chr22:17257787-19792353   | 2,534,566   | Deletion, 1 copy    | 1               |
| CHD          | chr22:17257787-19790220   | 2,532,433   | Deletion, 1 copy    | 1               |
| CHD          | chr22:17257787-19792353   | 2,534,566   | Deletion, 1 copy    | 1               |
| CHD          | chr15:20306549-20778963   | 472,414     | Deletion, 1 copy    | 1               |
| CHD          | chr22:20885078-21401228   | 516,150     | Deletion, 1 copy    | 1               |
| CHD          | chr22:17257787-18686993   | 1,429,206   | Deletion, 1 copy    | 1               |
| CHD          | chr8:11620338-11935618    | 315,280     | Duplication, 1 copy | 0               |
| CHD          | chr2:111303487-111617069  | 313,582     | Duplication, 1 copy | 0               |
| CHD          | chr9:194201-589666        | 395,465     | Duplication, 1 copy | NA*             |

|         |                          |           |                     |   |
|---------|--------------------------|-----------|---------------------|---|
| CHD     | chr22:21100917-21554058  | 453,141   | Deletion, 1 copy    | - |
| CHD     | chr15:20306549-20685685  | 379,136   | Deletion, 1 copy    | - |
| CHD     | chr6:65228140-66383666   | 1,155,526 | Deletion, 1 copy    | - |
| CHD     | chr16:15032942-16197033  | 1,164,091 | Deletion, 1 copy    | - |
| CHD     | chr7:158059922-158621330 | 561,408   | Duplication, 1 copy | - |
| CHD     | chr7:57212608-57593745   | 381,137   | Duplication, 1 copy | - |
| CHD     | chr16:21892987-22331199  | 438,212   | Duplication, 1 copy | - |
| CHD     | chr15:20306549-20685685  | 379,136   | Deletion, 1 copy    | - |
| CHD     | chr22:17257787-19792353  | 2,534,566 | Deletion, 1 copy    | - |
| CHD     | chr22:17257787-19792353  | 2,534,566 | Deletion, 1 copy    | - |
| CHD     | chr15:20306549-20685684  | 329,335   | Deletion, 1 copy    | - |
| CHD     | chr22:17257787-19729278  | 2,471,491 | Deletion, 1 copy    | - |
| CHD     | chr22:21024486-21554058  | 529,572   | Deletion, 1 copy    | - |
| CHD     | chr22:17257787-19792353  | 2,534,566 | Deletion, 1 copy    | - |
| CHD     | chr22:20784580-21330892  | 546,312   | Deletion, 1 copy    | - |
| CHD     | chr22:21100917-21554058  | 453,141   | Deletion, 1 copy    | - |
| CHD     | chr22:17257787-19792353  | 2,534,566 | Duplication, 1 copy | - |
| CHD     | chr1:244544759-244871447 | 326,688   | Duplication, 1 copy | - |
| CHD     | chr3:11622173-11958591   | 336,418   | Duplication, 1 copy | - |
| CHD     | chr22:21328337-21979242  | 650,905   | Deletion, 1 copy    | - |
| CHD     | chr22:17257787-19792353  | 2,534,566 | Deletion, 1 copy    | - |
| CHD     | chr22:17257787-19792353  | 2,534,566 | Deletion, 1 copy    | - |
| CHD     | chr22:21046568-21401228  | 354,660   | Deletion, 1 copy    | - |
| CHD     | chr6:162521711-162900893 | 379,182   | Duplication, 1 copy | - |
| CHD     | chr12:24803300-25155526  | 352,226   | Duplication, 1 copy | - |
| CHD     | chr15:20306549-20685684  | 329,335   | Duplication, 1 copy | - |
| CHD     | chr22:21328337-21979242  | 650,905   | Deletion, 1 copy    | - |
| CHD     | chr22:17257787-19792353  | 2,534,566 | Duplication, 1 copy | - |
| CHD     | chr22:19066315-19792353  | 726,038   | Duplication, 1 copy | - |
| CHD     | chr3:1394026-1975594     | 581,568   | Duplication, 1 copy | - |
| CHD     | chr12:33415349-34565140  | 1,149,791 | Duplication, 1 copy | - |
| CHD     | chr22:17257787-19792353  | 2,534,566 | Deletion, 1 copy    | - |
| CHD     | chr9:4117491-4537288     | 419,797   | Duplication, 1 copy | - |
| CHD     | chr22:17257787-19792353  | 2,534,566 | Deletion, 1 copy    | - |
| CHD     | chr3:832325-1403635      | 571,310   | Duplication, 1 copy | - |
| CHD     | chr22:17257787-19792353  | 2,534,566 | Deletion, 1 copy    | - |
| CHD     | chr9:36587-360439        | 323,852   | Deletion, 1 copy    | - |
| CHD     | chr3:133579573-133940085 | 360,512   | Deletion, 1 copy    | - |
| Control | chr22:19420148-19792353  | 372,205   | Duplication, 1 copy | - |
| Control | chr18:1070791-1767013    | 696,222   | Duplication, 1 copy | - |
| Control | chr4:117695261-118972510 | 1,277,249 | Deletion, 1 copy    | - |

|                                                                                   |                          |           |                       |   |
|-----------------------------------------------------------------------------------|--------------------------|-----------|-----------------------|---|
| Control                                                                           | chr3:2721456-3035501     | 314,045   | Duplication, 1 copy   | - |
| Control                                                                           | chr6:93770526-94218919   | 448,393   | Duplication, 1 copy   | - |
| Control                                                                           | chr8:13592327-14702986   | 1,110,659 | Duplication, 2 copies | - |
| Control                                                                           | chr4:189370201-189766567 | 396,366   | Deletion, 1 copy      | - |
| Control                                                                           | chr21:46289633-46909417  | 619,784   | Duplication, 1 copy   | - |
| Control                                                                           | chr21:46192812-46909417  | 716,605   | Duplication, 1 copy   | - |
| Control                                                                           | chr21:46391256-46909417  | 518,161   | Duplication, 1 copy   | - |
| Control                                                                           | chr3:832325-1403635      | 571,310   | Duplication, 1 copy   | - |
| Control                                                                           | chr15:20314760-20635884  | 321,124   | Duplication, 1 copy   | - |
| Control                                                                           | chr21:46086792-46909417  | 822,625   | Duplication, 1 copy   | - |
| Control                                                                           | chr1:246136535-246563486 | 426,951   | Duplication, 1 copy   | - |
| Control                                                                           | chr7:71532565-71921501   | 388,936   | Deletion, 1 copy      | - |
| Control                                                                           | chr15:20321135-20778963  | 457,828   | Deletion, 1 copy      | - |
| Control                                                                           | chr19:47975960-48387680  | 411,720   | Duplication, 1 copy   | - |
| Control                                                                           | chr15:20314760-20635884  | 321,124   | Duplication, 1 copy   | - |
| Control                                                                           | chr2:78591176-79811160   | 1,219,984 | Deletion, 1 copy      | - |
| Control                                                                           | chr3:540961-1325458      | 784,497   | Duplication, 1 copy   | - |
| Control                                                                           | chr21:46449972-46909417  | 459,445   | Duplication, 1 copy   | - |
| Control                                                                           | chr3:832325-1415351      | 583,026   | Duplication, 1 copy   | - |
| Control                                                                           | chr12:1142624-1461019    | 318,395   | Duplication, 1 copy   | - |
| Control                                                                           | chr15:29807358-30302218  | 494,860   | Duplication, 1 copy   | - |
| Control                                                                           | chr21:20828763-21672012  | 843,249   | Duplication, 1 copy   | - |
| <b>Total CNVs qPCR validated: 35/37 (94.6%)<br/>(Excluding 1 Sample Failure)*</b> |                          |           |                       |   |

Positions based on hg18 genome build.

\*Sample failure did not amplify tested CNV regions or control CNV regions, indicating poor DNA quality; denoted by "NA".

**Supplemental Table S2. Primer design for qPCR validation of CNVs in the CHD cohort.**

*Please see the Microsoft Excel Worksheet separately included with the online materials.*

**Supplemental Table S3. Sensitivity analyses from Cox proportional hazards regression by diagnostic class for the outcome of covariate-adjusted transplant-free survival.**

|                    | <b><u>Total N</u></b> | <b><u>N Events</u></b> | <b><u>CNV Burden<br/>Hazard Ratio (HR)</u></b> | <b><u>P-Value</u></b> |
|--------------------|-----------------------|------------------------|------------------------------------------------|-----------------------|
| Diagnostic Class 1 | 204                   | 9                      | 16.54 (1.71-159.80)                            | 0.015                 |
| Diagnostic Class 2 | 41                    | 2                      | 60.47 (0.15-2.45x10 <sup>9</sup> )             | 0.646                 |
| Diagnostic Class 3 | 46                    | 5                      | 6.64 (0.51-86.33)                              | 0.148                 |
| Diagnostic Class 4 | 131                   | 31                     | 2.47 (9.67-6.31)                               | 0.059                 |

*Cox proportional hazards regression analyses reported adjusted for all variables reported in the “Statistical Analyses” section of the Methods with the exception of Diagnostic Class (which was singular in each sensitivity analysis).*

| Number of Subjects | Targeted Region(s)                                                                                                         | Amplicon Position (hg18)  | Amplicon Sequence                                                                                             | UPL Probe Left Primer Sequence | Rig  |
|--------------------|----------------------------------------------------------------------------------------------------------------------------|---------------------------|---------------------------------------------------------------------------------------------------------------|--------------------------------|------|
| 1                  | chr1:239320770-240023059                                                                                                   | chr1:239824508-239824631  | tcacaatgggtctgctctcttccctccagctctgtagtctttagcaggcctctgacacctcagcagctggagccacagaaagctcgaagaaggagggagagaaaa     | 11 tcacaatgggtctgctctgc        | tttt |
| 1                  | chr2:111303487-1114617069                                                                                                  | chr2:111461205-111461304  | aacctctttgctctcacaacatggctgtaactgtgggggcaagctgaggaacagagta-gtatactcagggccatcatctccttaggg                      | 26 aacctctttgctctgc            | cca  |
| 1                  | chr3:95067163-95089113                                                                                                     | chr3:95285939-95285998    | gctctgagggaaatacaatagctctgctcctgctctcaggtgctcttcc                                                             | 84 gctctgagggaaatacaat         | gga  |
| 1                  | chr7:143056311-14305717                                                                                                    | chr7:14324233-14324299    | caactctctgctctcaacagattactctggagggagagacagagacagagaaacggagaaaa                                                | 16 caactctctgctctcaac          | tttt |
| 1                  | chr7:143297051-143297125                                                                                                   | chr7:143297051-143297125  | caactctctgctctctgctctcagcagctcagagggaaccccttaaaataaactcagctttggggaggg                                         | 3 caactctctgctctcaac           | gcc  |
| 1                  | chr8:11620338-11935618                                                                                                     | chr8:11748292-11748409    | cgacagggatggaaagagggctgctctcggggcttggcccaaccagcagcagcagagagggccagagctgcccacatgttgaagccgatcttagctccctggagagaca | 27 cgacagggatggaaagag          | tgtc |
| 1                  | chr9:194201-589666                                                                                                         | chr9:460625-460697        | caagaagcaccgctcactcagtggaagagagctgcaacagccagcagagtgagttgaagagggccc                                            | 76 caagaagcaccgctcact          | ggg  |
| 1                  | chr10:2682656-3123648                                                                                                      | chr10:2822646-2822705     | ccgctctctgttacttctgtaactcctgctgtgtgctgagatgagctgagagcaaaag                                                    | 76 ccgctctctgttacttctg         | ctt  |
| 1                  | chr10:46410734-47173619                                                                                                    | chr10:47128596-47128719   | ggtagcagggactgactgagaattttcaaccctcctggctcagagagagccaccacacatgcccagagatggagcagctgctgcaggggcaagcaggtcacagatgca  | 58 ggtagcagggactgactgag        | tgg  |
| 1                  | chr10:133136594-133608348                                                                                                  | chr10:133261877-133261938 | cttggtaaccgagcagggatccattcattcagcattcagctcctcctcggaaaggagac                                                   | 42 cttggtaaccgagcagag          | gtc  |
| 1                  | chr12:33415349-34669982                                                                                                    | chr12:33644954-33645013   | aatcccgagggaggtgtgacttggggagcagctttagtagcagcaagcagctagagtg                                                    | 32 aatcccgagggaggtgtg          | cac  |
| 1                  | chr13:102725809-103348161                                                                                                  | chr13:102965076-102965136 | tcactctccaggctagaggcttttaactcctcctcagctcaggtgattgggaattgat                                                    | 13 tcactctccaggctagagg         | atg  |
| 5                  | chr15:20306549-20685685                                                                                                    | chr15:20415639-20415748   | acttgcagctatgagaaatttttcttaaggagggagagataccatgatgactctcagctcaattttgataaaaagagaagaagaacaatggcagaatgtg          | 12 acttgcagctatgagaaat         | cac  |
| 1                  | chr16:15032942-16197033                                                                                                    | chr16:16045782-16045846   | aaggcttacctctgtgttcaggcagccgctgagaggtgtgactcctcaaggatctgc                                                     | 27 aaggcttacctctgtgtt          | gca  |
| 1                  | chr18:13417800-15112502                                                                                                    | chr18:13731942-13732020   | caggcacagatgaaccagctgatgagagatataccttccagcttaattttattggtgactgttggatc                                          | 11 caggcacagatgaaccag          | gat  |
| 14                 | chr22:17257787-19792353, chr22:17257787-19726528, chr22:17257787-19790220, chr22:17257787-18686993                         | chr22:17729380-17729493   | ttctcatgctgctgctctcagggaggtctggggctcagctcttccaaaggttctctctttaaactgcaaaaaacattacacactctcttcagaacc              | 79 ttctcatgctgctgctgct         | ggf  |
| 5                  | chr22:20885078-21401228, chr22:21011312-21554058, chr22:21024486-2141861, chr22:21024486-21554058, chr22:21122400-21554058 | chr22:21222666-21222627   | cgagaccttactggaagaaggctgctctgctctgctcctcaacctacttcttgc                                                        | 13 cgagaccttactggaatga         | gsg  |
|                    | SNCA Control                                                                                                               | chr4:90962489-90962560    | gctgagaagaccaagagcagtgacaagtgtggaggagcagtggtgacgggtgacagcagtagccag                                            | 68 gctgagaagaccaagagc          | ctg  |
|                    | GAPDH Control                                                                                                              | chr12:6515824-6515886     | gctgattgccctctaaaggaggagggctcagggtgctcactattctggaggagcttc                                                     | 10 gctgattgccctctaa            | gag  |
